# Supplementary material
Source: Springer Nature journal article supplement (https://www.springermedizin.de/resource/supplementary/12916_2013_945_MOESM3_ESM.pdf/9598888)

**Quality criterion****n / N**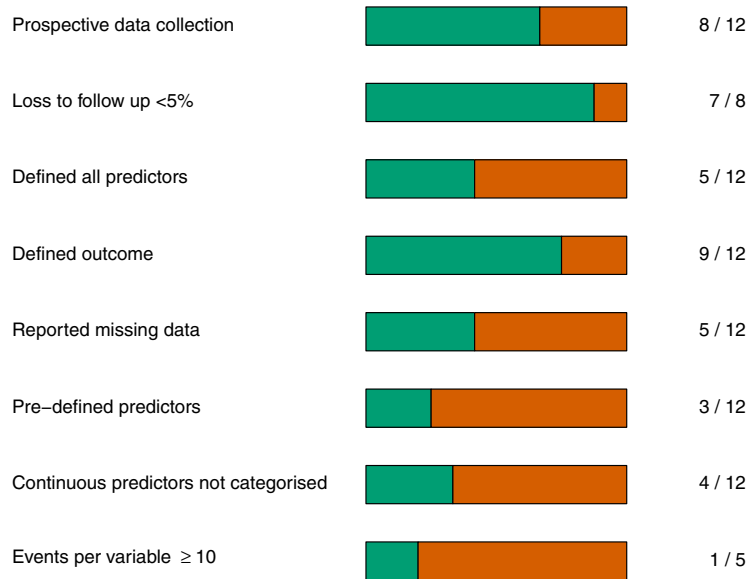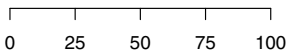

Percentage meeting quality criterion

Supplement: MOESM3 [file 9598888]
